# Supplementary material for: Structural insights into the regulation of monomeric and dimeric apelin receptor
Source: PubMed Central journal article supplement (PMC11697037; doi:10.1038/s41467-024-55555-6), 2025-01-02

## Supplementary Information

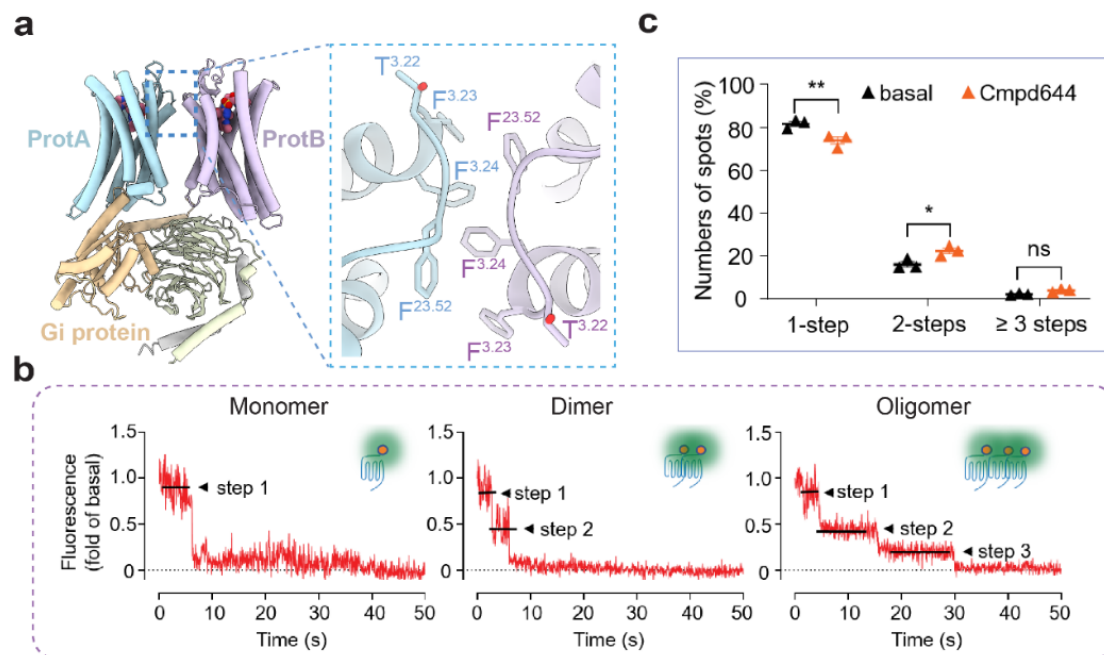

**Supplementary Figure 1. Characterization of APJR dimerization on cell surface by the single-molecule imaging approach.** **a**, APJR dimer and downstream Gi-protein complex surface model from cmpd644-APJR-Gi complex (PDB ID: 7W0L). The dimer interface “FGTFF” motif is shown in sticks. **b**, Representative fluorescence time course for an individual molecule. Left, 1-step photobleaching (monomer); middle, 2-steps photobleaching (dimer) and right, 3-steps photobleaching (trimer). **c**, Histogram of photobleaching step numbers for all Snap-APJR molecules analyzed. 1867 spots from 9 movies in basal group (no-treatment); and 1234 spots from 8 movies in cmpd644 group (1 mM treatment for 30 min) were analyzed. Data are mean ± SEM from three biologically independent experiments and were analyzed using two-way ANOVA with Tukey’s multiple comparisons test. Source data are provided as a Source Data file.

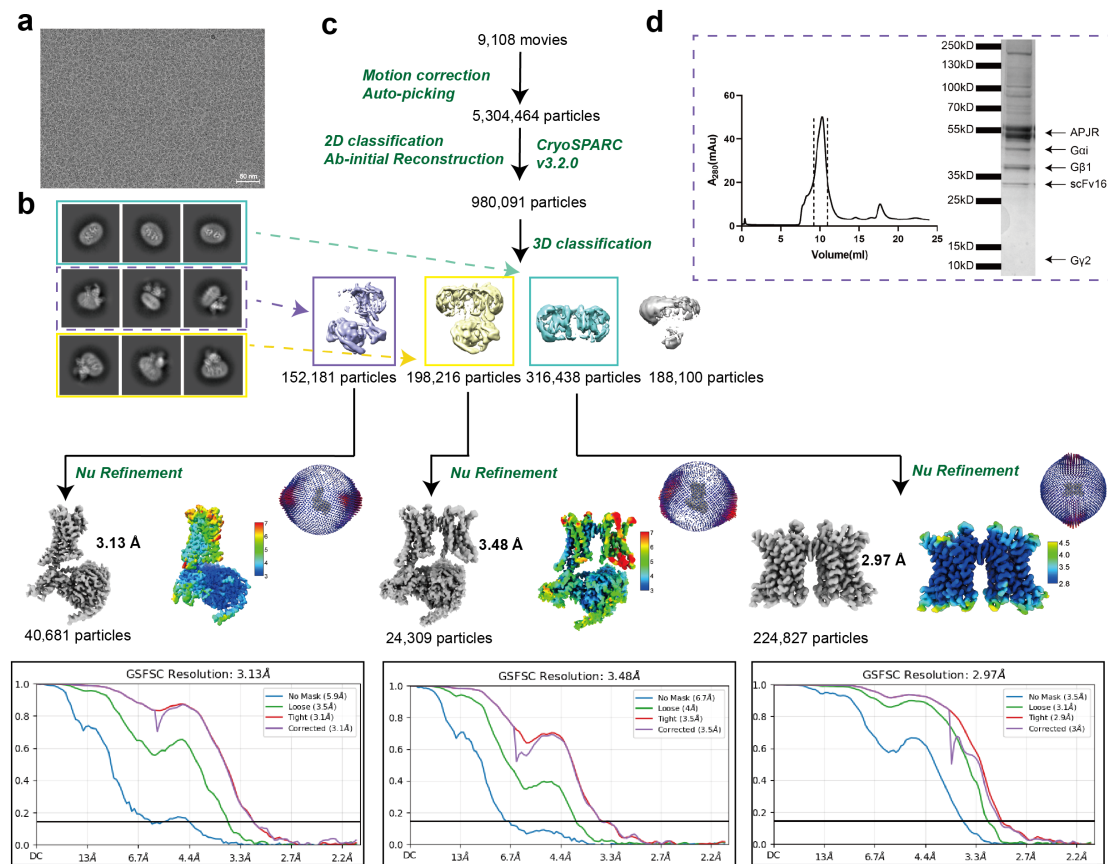

**Supplementary Figure 2. Cryo-EM sample preparation, data collection and processing for APJR<sup>AP13</sup>-Gi-scFv16 complex and apo-APJR.** a-d, Representative cryo-EM image derived from 9,108 micrographs of the APJR<sup>AP13</sup>-Gi-scFv16 complex, with a scale bar of 50 nm (a). Representative 2D averages showing distinct secondary structural features from various perspectives of the complex (b). Cryo-EM data processing workflow: The data underwent processing using CryoSPARC, and density map images were generated in UCSF Chimera. The final 3D density maps are color-coded based on local resolution and angular distribution of the particles used for the final reconstruction. Gold-standard FSC curves from Phenix indicate nominal resolutions of 3.48 Å, 3.13 Å, and 2.97 Å, employing the FSC = 0.143 criterion for the *dim*APJR<sup>AP13</sup>-Gi map, *mon*APJR<sup>AP13</sup>-Gi map, and apo-APJR, respectively (c). Elution profile and gel image of APJR (comprising residues 1–350), Gi, Gβ, Gγ, and scFv16 after SEC purification. The collected fraction for cryo-EM sample were marked between dashed lines (d).

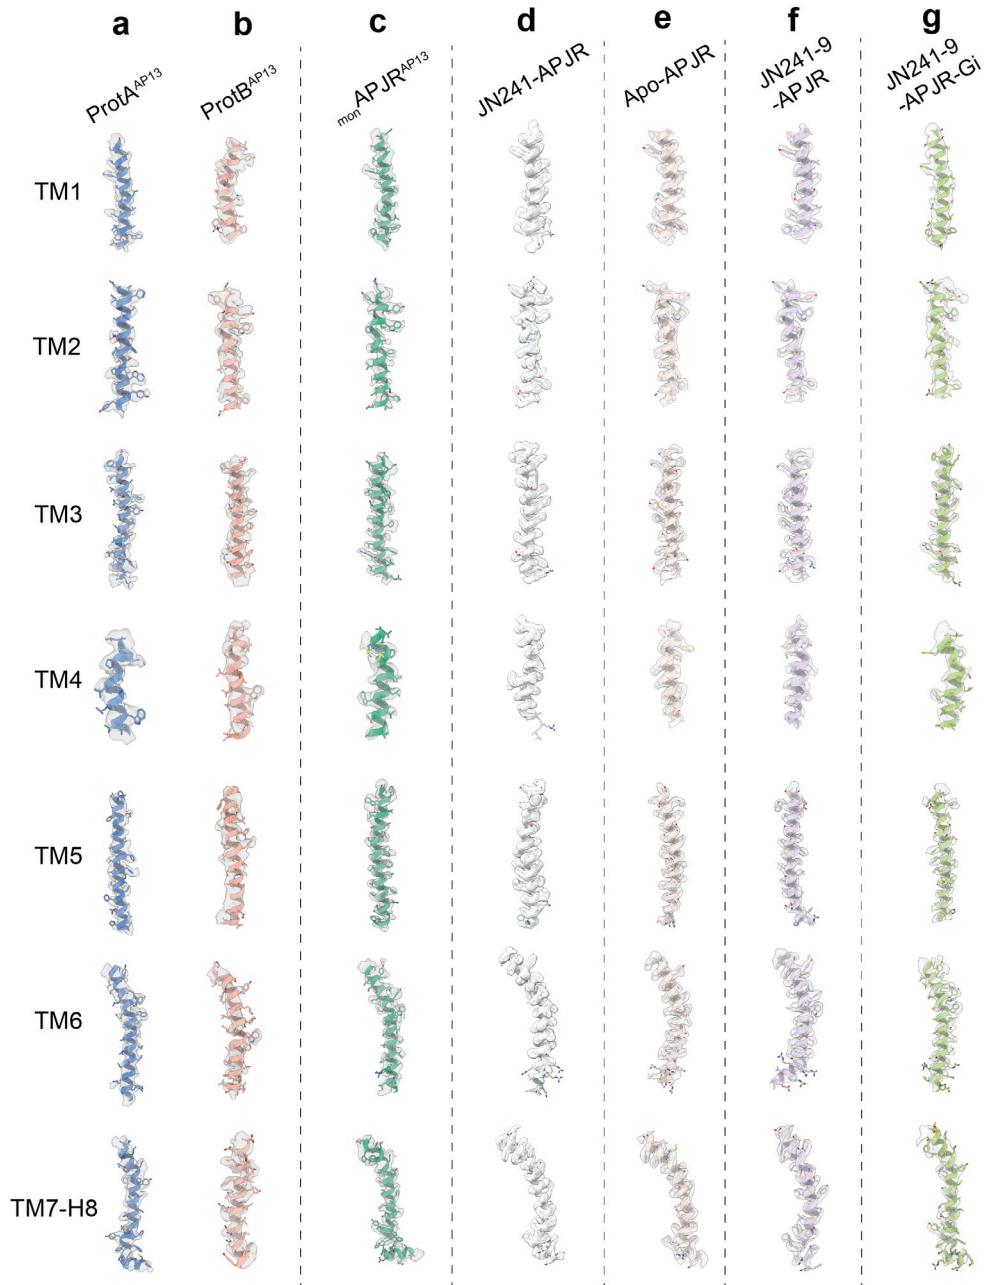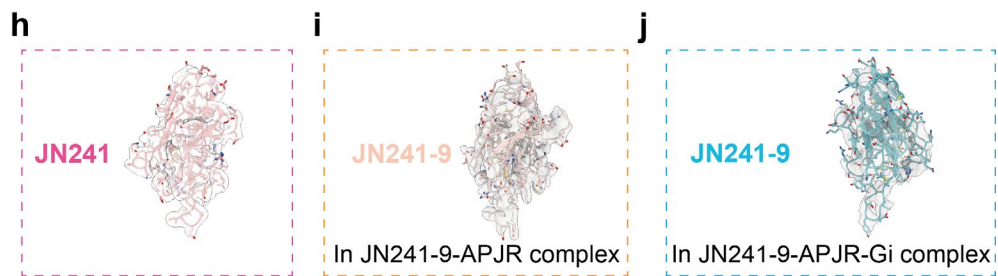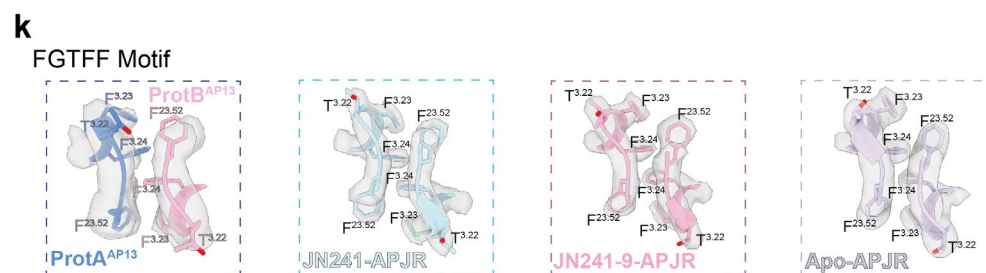

**Supplementary Figure 3. Cryo-EM density maps and models of representative helices from the  $\text{dimAPJR}^{\text{AP13}}\text{-Gi}$ ,  $\text{monAPJR}^{\text{AP13}}\text{-Gi}$ , JN241-APJR, apo-APJR, JN241-9-APJR and JN241-9-APJR-Gi structures. a-g, Cryo-EM density maps and models of TM1, TM2, TM3, TM4, TM5, TM6, TM7-H8 in the PortA (a) and ProtB (b) of  $\text{dimAPJR}^{\text{AP13}}\text{-Gi}$ ,  $\text{monAPJR}^{\text{AP13}}\text{-Gi}$  (c), JN241-APJR (d), apo-APJR (e), JN241-9-APJR (f) and JN241-9-APJR-Gi (g). h-j, Cryo-EM density maps and models of JN241 in JN241-APJR complex (h), JN241-9 in the JN241-9-APJR complex (i) and JN241-9 in the JN241-9-APJR-Gi complex (j). k, Cryo-EM density maps and models of FGTF motif (dimer interface) in  $\text{dimAPJR}^{\text{AP13}}\text{-Gi}$ , JN241-APJR, JN241-9-APJR and apo-APJR complexes, respectively.**

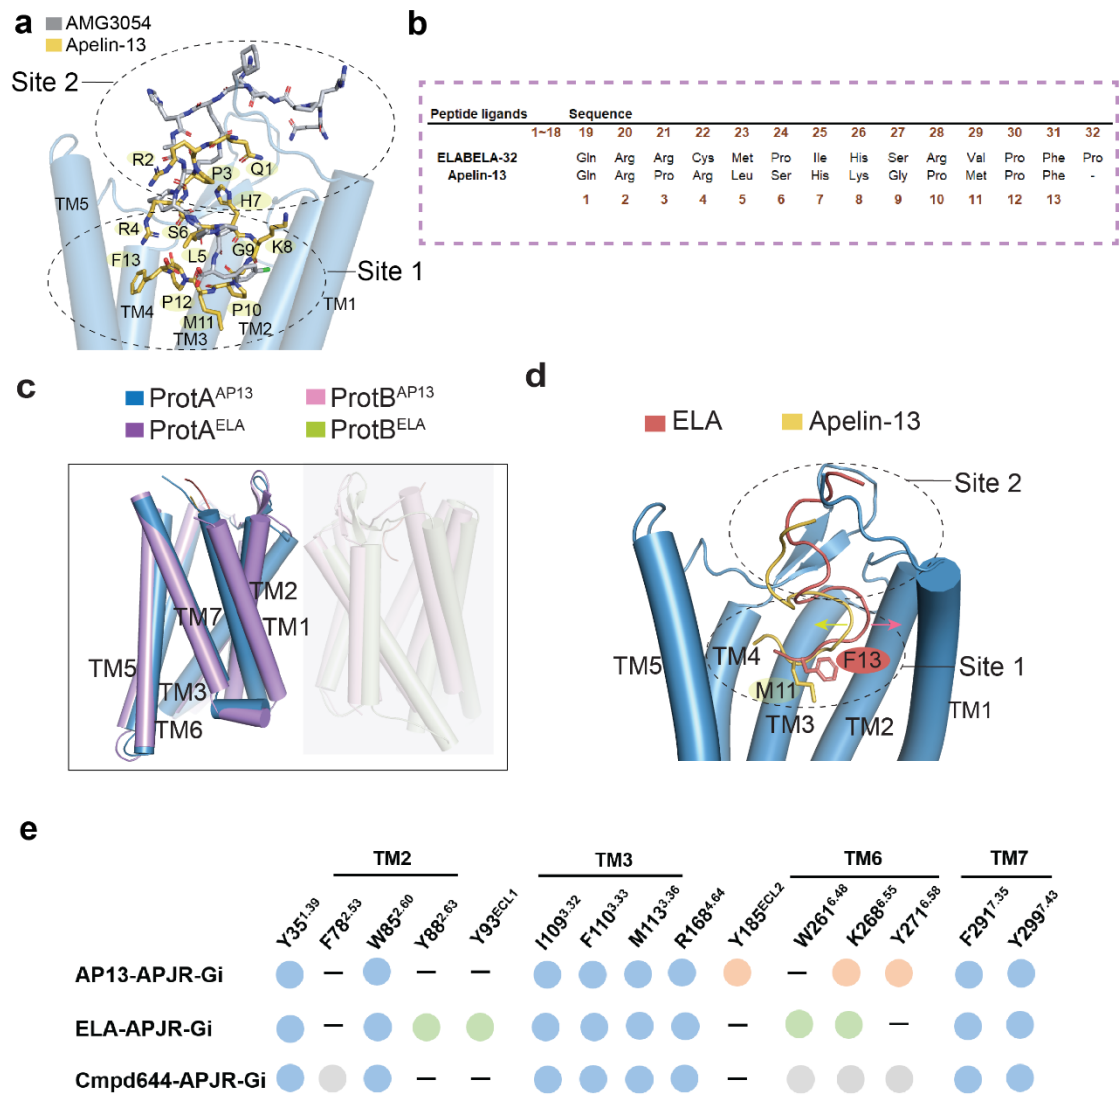

**Supplementary Figure 4. Structural comparison between  $\text{dimAPJR}^{\text{AP13}}\text{-Gi}$  and  $\text{monAPJR}^{\text{AP13}}\text{-Gi}/\text{AMG3054-APJR}$  complexes and peptide sequence alignment between apelin-13 and ELA. **a**, Structural comparison of apelin-13 and AMG3054. Apelin-13 is depicted in yellow, and AMG3054 is depicted in gray. APJR in the  $\text{ProtA}^{\text{AP13}}$  structure is illustrated in blue cylinders, with site 1 and site 2 encircled by dashed lines. **b**, Sequence alignment of ELA-32 and apelin-13. Peptide numbering (upper panel for ELA-32, lower panel for apelin-13) is highlighted in brown. The 1-18 residues of ELA-32 have been omitted. **c**, Structural superposition of ProtAs in apelin-13- with ELA-bound APJR-Gi structure.  $\text{ProtA}^{\text{AP13}}$  and  $\text{ProtA}^{\text{ELA}}$  are colored in blue and purple cylinders, respectively. **d**, Structural comparison of apelin-13 and ELA. Apelin-13 and ELA are shown in yellow and red, respectively, with APJR depicted in blue cylinders. The orientation of the two peptide ligands is indicated with arrows. **e**,**

Sequence alignment of key residues of APJR in the ligand binding pocket. The key residues in the ligand-binding pocket of APJR are aligned, with residues interacting with apelin-13 colored in orange, residues interacting with ELA colored in green, and residues interacting with cmpd644 colored in gray. Conserved residues are highlighted in blue.



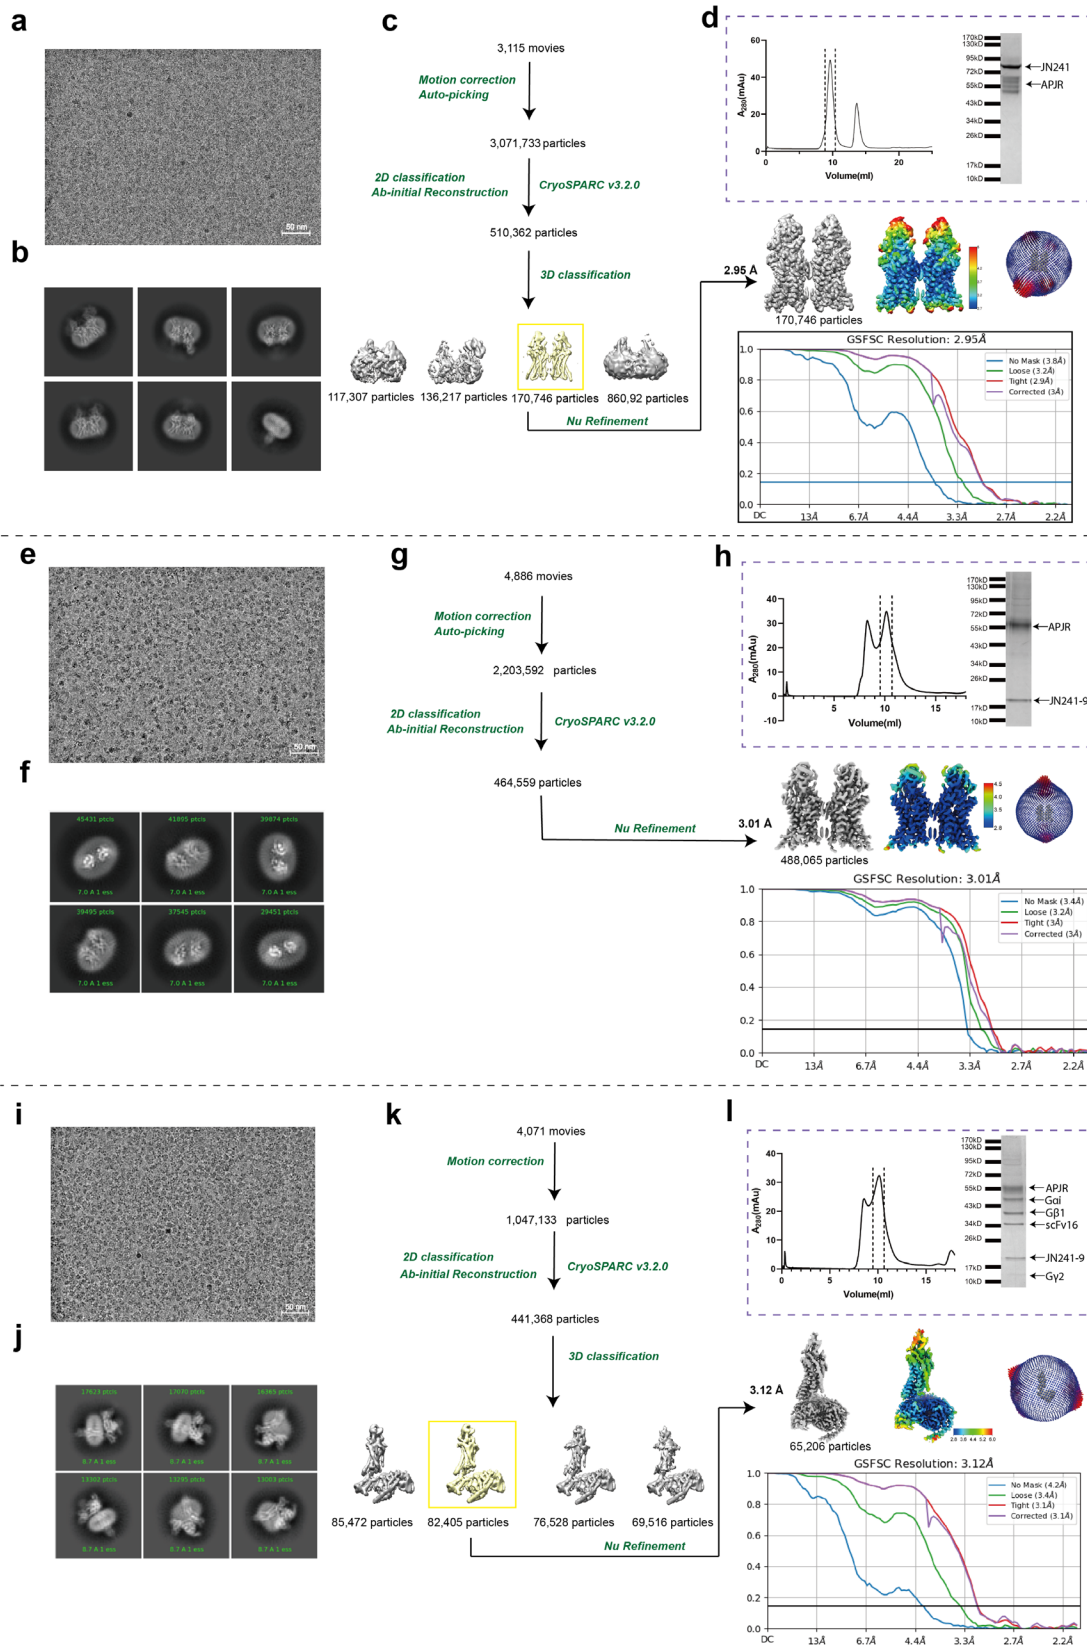

Supplementary Figure 5. Cryo-EM sample preparation, data collection and processing for JN241-APJR. a-d, Representative cryo-EM image derived from 3,115

micrographs of the JN241-APJR complex (50 nm scale) **(a)**. Representative 2D averages of complex **(b)**. Cryo-EM workflow with CryoSPARC and UCSF Chimera, 3D density maps color-coded by local resolution, angular distribution of the particles used for the final reconstruction, and FSC curves show 2.95 Å resolution **(c)**. Elution profile and gel image of APJR and JN241 after SEC purification. The collected fraction for cryo-EM sample were marked between dashed lines **(d)**. **e-h**, Representative cryo-EM image derived from 4,886 micrographs of the JN241-9-APJR complex (50 nm scale) **(e)**. Representative 2D averages of complex **(f)**. Cryo-EM workflow with CryoSPARC and UCSF Chimera, 3D density maps color-coded by local resolution, angular distribution of the particles used for the final reconstruction, and FSC curves show 3.01 Å resolution **(g)**. Elution profile and gel image of APJR and JN241-9 after SEC purification. The collected fraction for cryo-EM sample were marked between dashed lines **(h)**. **i-l**, Representative cryo-EM image derived from 4,071 micrographs of the JN241-9-APJR-G<sub>i</sub> complex (50 nm scale) **(i)**. Representative 2D averages of complex **(j)**. Cryo-EM workflow with CryoSPARC and UCSF Chimera, 3D density maps color-coded by local resolution, angular distribution of the particles used for the final reconstruction, and FSC curves show 3.12 Å resolution **(k)**. Elution profile and gel image of APJR, G<sub>αi</sub>, G<sub>β</sub>, G<sub>γ</sub>, scFv16 and JN241-9 after SEC purification. The collected fraction for cryo-EM sample were marked between dashed lines **(l)**.



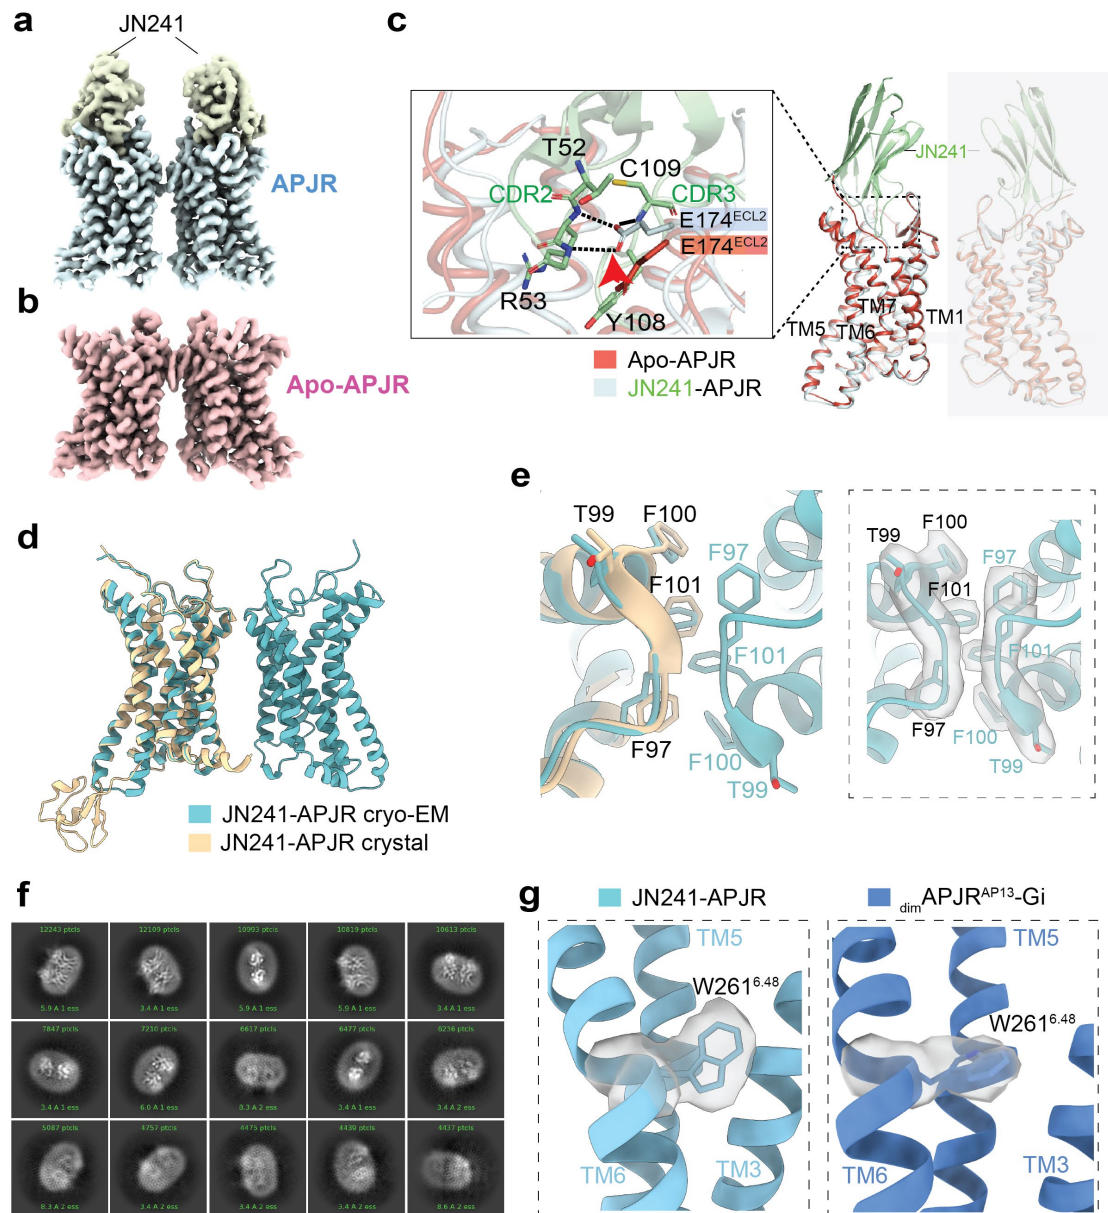

**Supplementary Figure 6. Structural characterization of JN241-APJR and apo-APJR dimers, and comparison with ProtB in apelin-13-bound APJR-Gi structure.**

**a**, Cryo-EM map of JN241-APJR complex. APJR is depicted in light cyan, and JN241 is shown in light green. **b**, Cryo-EM map of apo-APJR without G-protein coupling. Apo-APJR, separated from the dataset of the APJR<sup>AP13</sup>-Gi complex, is colored in pink. **c**, Conformational comparison of E174<sup>ECL2</sup> in JN241- and apo- APJR. Hydrogen bonds formed by residues T52/R53 from CDR2 of JN241 or residue C109 from CDR3 in JN241 are indicated with arrows. The symmetric partner in the JN241-APJR dimer structure is shaded in gray. **d, e**, Structural comparison between JN241-APJR cryo-EM

and crystal (PDB ID: 6KNM) structures. Overall structural comparison between JN241-APJR cryo-EM and crystal structures (**d**). Superimposition of the crystal structure of JN241-APJR onto cryo-EM structure, with a focus on the dimeric interface of FGTFE motif, shows subtle conformational changes in the side chains of three critical phenylalanine residues. Additionally, the cryo-EM density map for the amino acids comprising the FGTFE motif is shown (**e**). **f**, Representative 2D averages of the JN241-APJR complex, devoid of the Fc tag, consistently exhibit dimer formation, indicating that the presence or absence of the Fc tag does not affect the dimerization of APJR. **g**, Cryo-EM density maps for the "toggle switch" residue W261<sup>6,48</sup> within the JN241-APJR complex and  $\text{dimAPJR}^{\text{AP13}}$ -Gi complex structures, respectively.

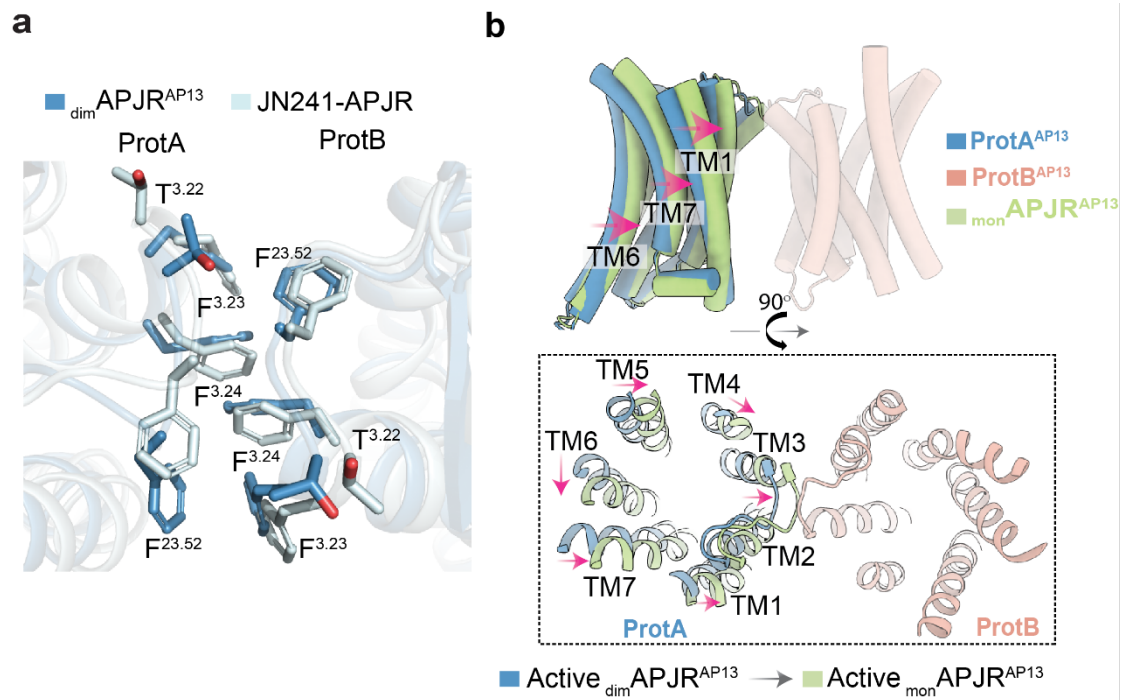

**Supplementary Figure 7. Structural comparisons of the dimer interface and the structural transitions from APJR dimer to monomer. a,** The "FGTFF motif" residues (shown in sticks) at the dimer interface in apelin-13-bound and antagonist-bound structures are illustrated. **b,** Structural transitions from active dimer to active monomer induced by apelin-13 are depicted. Superposition of  $_{dim}$ APJR<sup>AP13</sup>-Gi (ProtA: blue, ProtB: pink) and  $_{mon}$ APJR<sup>AP13</sup>-Gi (green) aligned on the Gi protein portion, with the Gi protein omitted.

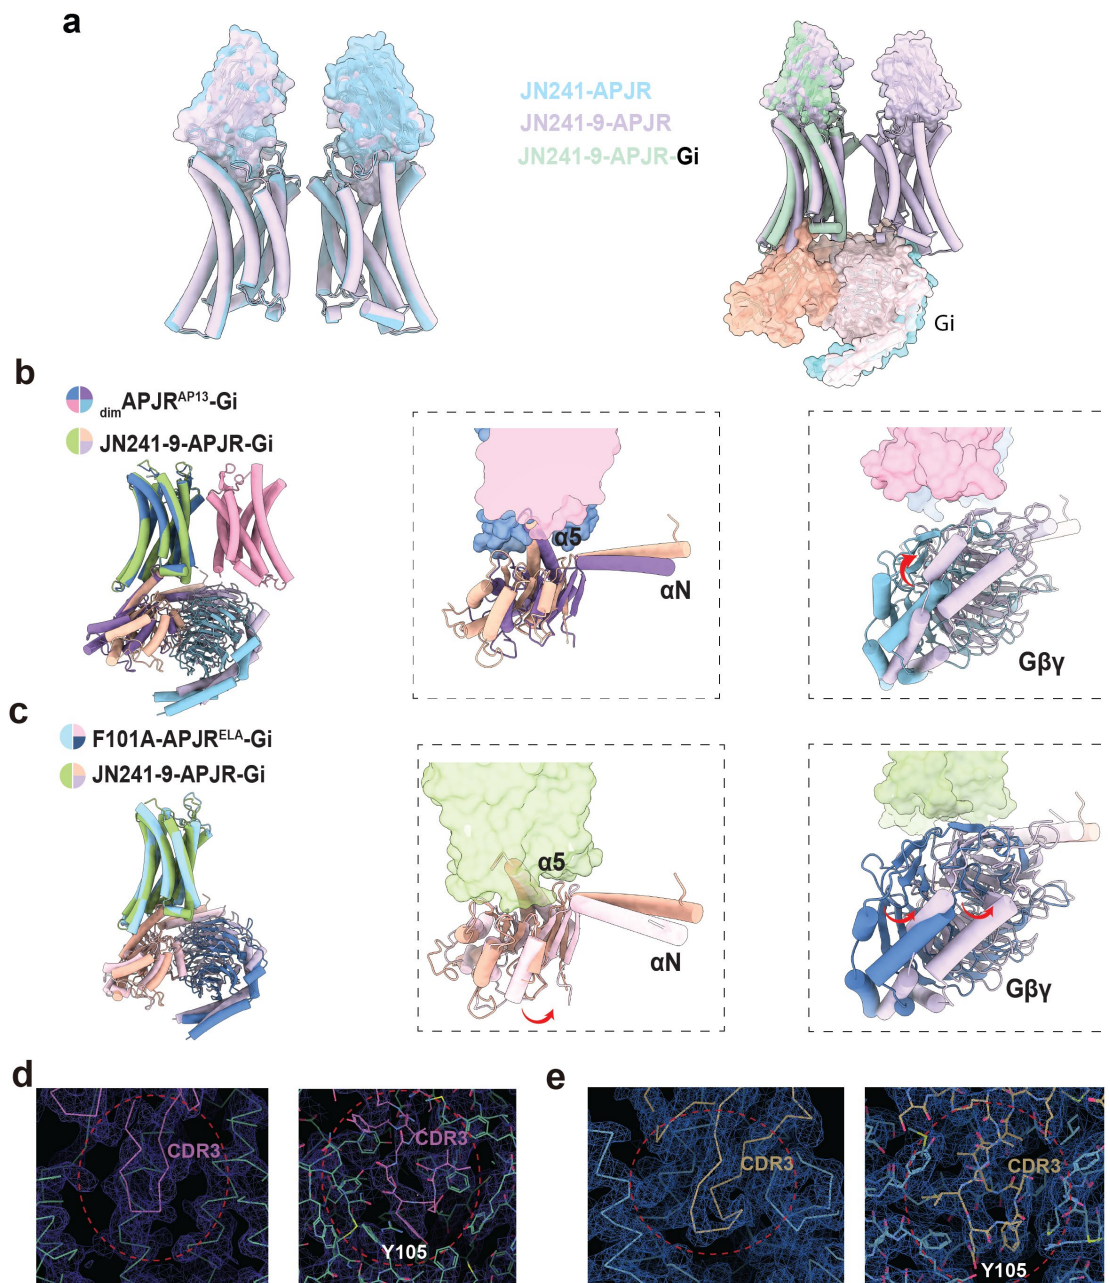

**Supplementary Figure 8. The dimerization modes and conformational changes in transmembrane domains of APJR in different functional states. a,** Structural alignments of JN241-APJR, JN241-9-APJR, and JN241-9-APJR-Gi complexes. **b,** Structural superposition of dimAPJR<sup>AP13</sup>-Gi and JN241-9-APJR-Gi complexes shows conformational shifts in G $\alpha$  and G $\beta\gamma$ , indicated by arrows. These shifts suggest an upward displacement in the JN241-9-APJR-Gi complex towards the region that would otherwise be occupied by ProtB in the dimAPJR<sup>AP13</sup>-Gi complex. **c,** Structural superposition of F101A-APJR<sup>ELA</sup>-Gi (PDB ID: 7W0P) and JN241-9-APJR-Gi

complexes. The conformational changes of  $G\alpha$  and  $G\beta\gamma$  were indicated as arrows. **d, e**, Cryo-EM maps of CDR3 region of JN241-9 in the orthosteric pocket, with the key residue Y105 highlighted: **(d)** CDR3 region of JN241-9 in the  $G_i$  protein-bound structure, shown as cartoon (left) and sticks (right), respectively; **(e)** CDR3 region of JN241-9 in the  $G_i$  protein-free structure, shown as cartoon (left) and sticks (right), respectively.

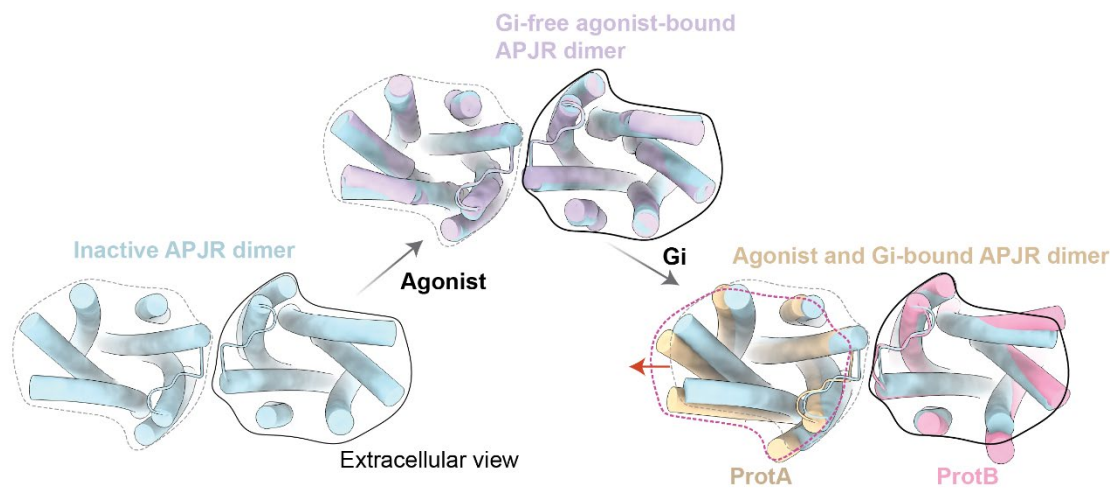

**Supplementary Figure 9. The dimerization modes and conformational changes in transmembrane domains of APJR in different functional states.** Various dimerization modes of the transmembrane domain of APJR during receptor activation, aligned on ProtBs. The red arrow indicates the movement of ProtA upon agonist and Gi binding.

**Supplementary Table 1. Cryo-EM data collection, refinement and validation statistics of G protein coupled GPCR complexes.**

|                                        | dimAPJR <sup>AP13</sup> -Gi | monAPJR <sup>AP13</sup> -Gi | Apo APJR  |
|----------------------------------------|-----------------------------|-----------------------------|-----------|
| Data collection and processing         |                             |                             |           |
| Magnification                          | 105,000                     | 105,000                     | 105,000   |
| Voltage (kV)                           | 300                         | 300                         | 300       |
| Electron exposure (e-/Å <sup>2</sup> ) | 60                          | 60                          | 60        |
| Defocus range (µm)                     | -0.7~-2.2                   | -0.7~-2.2                   | -0.7~-2.2 |
| images                                 | 9108                        | 9108                        | 9108      |
| Pixel size (Å)                         | 1.04                        | 1.04                        | 1.04      |
| Symmetry imposed                       | C1                          | C1                          | C2        |
| Final particles                        | 24,309                      | 40,681                      | 224,827   |
| Map resolution                         | 3.48                        | 3.13                        | 2.97      |
| FSC threshold                          | 0.143                       | 0.143                       | 0.143     |
| Refinement                             |                             |                             |           |
| Initial model used (PDB code)          | 7W0L                        | 7W0M                        | 7SUS      |
| Map sharpening                         |                             |                             |           |
| B factor (Å)                           | 61.0                        | 64.9                        | 96.2      |
| Model composition                      |                             |                             |           |
| Non-hydrogen atoms                     | 11348                       | 9233                        | 4842      |
| Protein residues                       | 1442                        | 1177                        | 597       |
| Ligand                                 | 0                           | 0                           | 2         |
| B-factors                              |                             |                             |           |
| Protein                                | 90.62                       | 67.71                       | 44.89     |
| Ligand                                 |                             |                             | 37.65     |
| R.M.S. deviations                      |                             |                             |           |
| Bond lengths (Å)                       | 0.003                       | 0.004                       | 0.004     |
| Bond angles (°)                        | 0.752                       | 0.677                       | 0.664     |
| Validation                             |                             |                             |           |
| MolProbity score                       | 2.21                        | 2.08                        | 1.89      |
| Clash score                            | 20.32                       | 14.35                       | 12.59     |
| Poor rotamers (%)                      | 0.00                        | 0.00                        | 0.00      |
| Ramachandran plot                      |                             |                             |           |
| Favored (%)                            | 93.87                       | 93.71                       | 95.94     |
| Allowed (%)                            | 6.13                        | 6.20                        | 4.06      |
| Disallowed (%)                         | 0.00                        | 0.09                        | 0.00      |
| EMD code                               | 38574                       | 38575                       | 38578     |
| PDB code                               | 8XQE                        | 8XQF                        | 8XQI      |



|                                            | JN241-APJR | JN241-9-APJR | JN241-9-APJR-Gi |
|--------------------------------------------|------------|--------------|-----------------|
| Magnification                              | 105,000    | 105,000      | 105,000         |
| Voltage (kV)                               | 300        | 300          | 300             |
| Electron exposure (e-<br>/Å <sup>2</sup> ) | 60         | 60           | 60              |
| Defocus range (μm)                         | -0.7~-2.2  | -0.7~-2.2    | -0.7~-2.2       |
| images                                     | 3115       | 4,886        | 4,071           |
| Pixel size (Å)                             | 1.04       | 1.04         | 1.04            |
| Symmetry imposed                           | C2         | C1           | C1              |
| Final particles                            | 170,746    | 488,065      | 65,206          |
| Map resolution                             | 2.95       | 3.01         | 3.12            |
| FSC threshold                              | 0.143      | 0.143        | 0.143           |
| Refinement                                 |            |              |                 |
| Initial model used (PDB<br>code)           | 7SUS       | 7SUS         | 7W0L            |
| Map sharpening                             |            |              |                 |
| B factor (Å)                               | 85.6       | 136.8        | 121.4           |
| Model composition                          |            |              |                 |
| Non-hydrogen atoms                         | 6904       | 6709         | 10089           |
| Protein residues                           | 864        | 847          | 1293            |
| Ligand                                     | 4          | 2            |                 |
| B-factors                                  |            |              |                 |
| Protein                                    | 58.62      | 66.42        | 77.45           |
| Ligand                                     | 74.36      | 49.30        |                 |
| R.M.S. deviations                          |            |              |                 |
| Bond lengths (Å)                           | 0.003      | 0.003        | 0.003           |
| Bond angles (°)                            | 0.568      | 0.630        | 0.661           |
| Validation                                 |            |              |                 |
| MolProbity score                           | 1.83       | 1.90         | 2.01            |
| Clash score                                | 10.26      | 13.38        | 16.06           |
| Poor rotamers (%)                          | 0.00       | 0.00         | 0.00            |
| Ramachandran plot                          |            |              |                 |
| Favored (%)                                | 95.68      | 96.07        | 95.69           |
| Allowed (%)                                | 4.32       | 3.93         | 4.23            |
| Disallowed (%)                             | 0.00       | 0.00         | 0.00            |
| EMD code                                   | 38579      | 39810        | 39816           |
| PDB code                                   | 8XQJ       | 8Z74         | 8Z7J            |

**Supplementary Table 2. Mutational effects on cAMP accumulation of APJR induced by apelin-13 and ELA measured by Glo-Sensor assays.**

| Ligands      | Apelin-13                      |                                   | ELA                            |                                   | Expression Level $\pm$ SEM (% WT) |
|--------------|--------------------------------|-----------------------------------|--------------------------------|-----------------------------------|-----------------------------------|
|              | Gi signaling                   |                                   |                                |                                   |                                   |
|              | pEC50 $\pm$ SEM                | E <sub>max</sub> $\pm$ SEM (% WT) | pEC50 $\pm$ SEM                | E <sub>max</sub> $\pm$ SEM (% WT) |                                   |
| <b>WT</b>    | 10.68 $\pm$ 0.11               | 100 $\pm$ 0.00                    | 10.34 $\pm$ 0.09               | 100 $\pm$ 0.00                    | 100 $\pm$ 0.00                    |
| <b>F78A</b>  | 10.32 $\pm$ 0.01 <sup>ns</sup> | 83.49 $\pm$ 5.84 <sup>ns</sup>    | 9.40 $\pm$ 0.03*               | 72.46 $\pm$ 3.79 <sup>ns</sup>    | 122.07 $\pm$ 13.23 <sup>ns</sup>  |
| <b>I109A</b> | 10.59 $\pm$ 0.06 <sup>ns</sup> | 90.86 $\pm$ 9.24 <sup>ns</sup>    | 9.56 $\pm$ 0.05 <sup>ns</sup>  | 86.49 $\pm$ 19.63 <sup>ns</sup>   | 106.40 $\pm$ 4.28 <sup>ns</sup>   |
| <b>M113A</b> | 10.67 $\pm$ 0.13 <sup>ns</sup> | 79.24 $\pm$ 4.12 <sup>ns</sup>    | 10.49 $\pm$ 0.05 <sup>ns</sup> | 79.11 $\pm$ 1.81 <sup>ns</sup>    | 84.50 $\pm$ 4.41 <sup>ns</sup>    |
| <b>Y185A</b> | ND                             | ND                                | 9.81 $\pm$ 0.49 <sup>ns</sup>  | 50.25 $\pm$ 6.43 <sup>ns</sup>    | 56.82 $\pm$ 12.04*                |
| <b>K268A</b> | 9.39 $\pm$ 0.09 <sup>ns</sup>  | 63.36 $\pm$ 7.01 <sup>ns</sup>    | 8.82 $\pm$ 0.23 <sup>***</sup> | 25.62 $\pm$ 41.00*                | 124.10 $\pm$ 16.95 <sup>ns</sup>  |
| <b>F291A</b> | 10.66 $\pm$ 0.23 <sup>ns</sup> | 73.81 $\pm$ 12.87 <sup>ns</sup>   | 10.53 $\pm$ 0.10 <sup>ns</sup> | 72.46 $\pm$ 9.89 <sup>ns</sup>    | 100.72 $\pm$ 18.62 <sup>ns</sup>  |
| <b>Y299A</b> | 10.28 $\pm$ 0.11 <sup>ns</sup> | 93.42 $\pm$ 10.29 <sup>ns</sup>   | 10.37 $\pm$ 0.27 <sup>ns</sup> | 139.30 $\pm$ 5.64 <sup>ns</sup>   | 88.52 $\pm$ 1.98 <sup>ns</sup>    |
| <b>Y271A</b> | 6.07 $\pm$ 2.43 <sup>**</sup>  | 55.76 $\pm$ 2.99 <sup>ns</sup>    | 9.64 $\pm$ 0.14 <sup>ns</sup>  | 80.09 $\pm$ 12.24 <sup>ns</sup>   | 94.03 $\pm$ 2.68 <sup>ns</sup>    |

The data are presented as the mean  $\pm$  SEM of three independent experiments performed in triplicates (n=3). ND indicates no detectable signal. <sup>ns</sup>P > 0.05, \*P < 0.05, \*\*P < 0.01, \*\*\*P < 0.001 and \*\*\*\*P < 0.0001 by one-way ANOVA followed by Dunnett's multiple comparisons test, compared with the response of the APJR-WT.

Uncropped SDS PAGE (Supplementary Figure 2d)

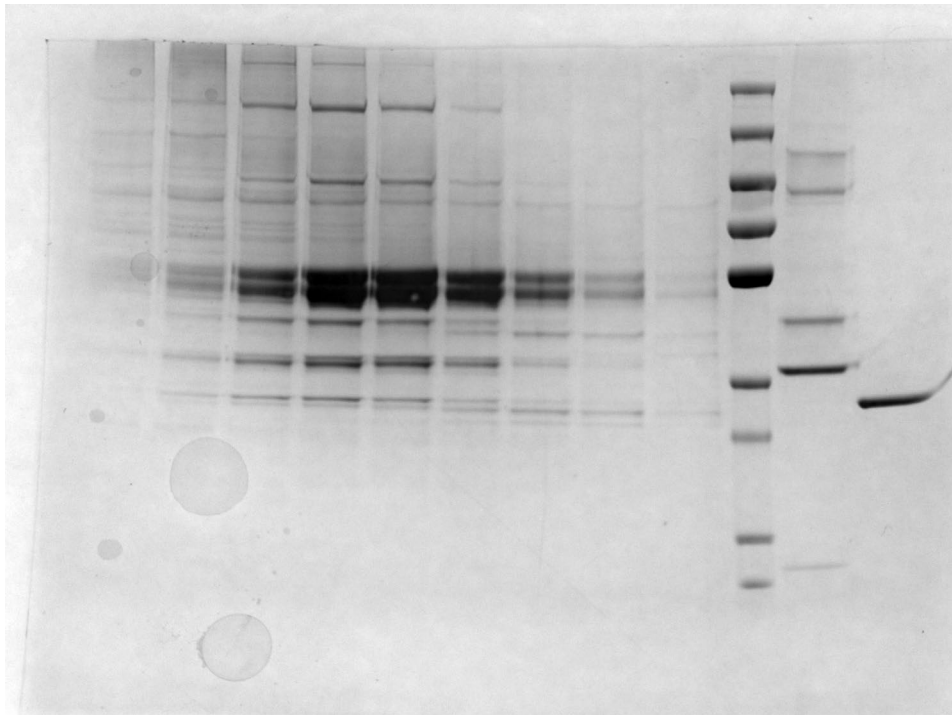

Uncropped SDS PAGE (Supplementary Figure 5d)

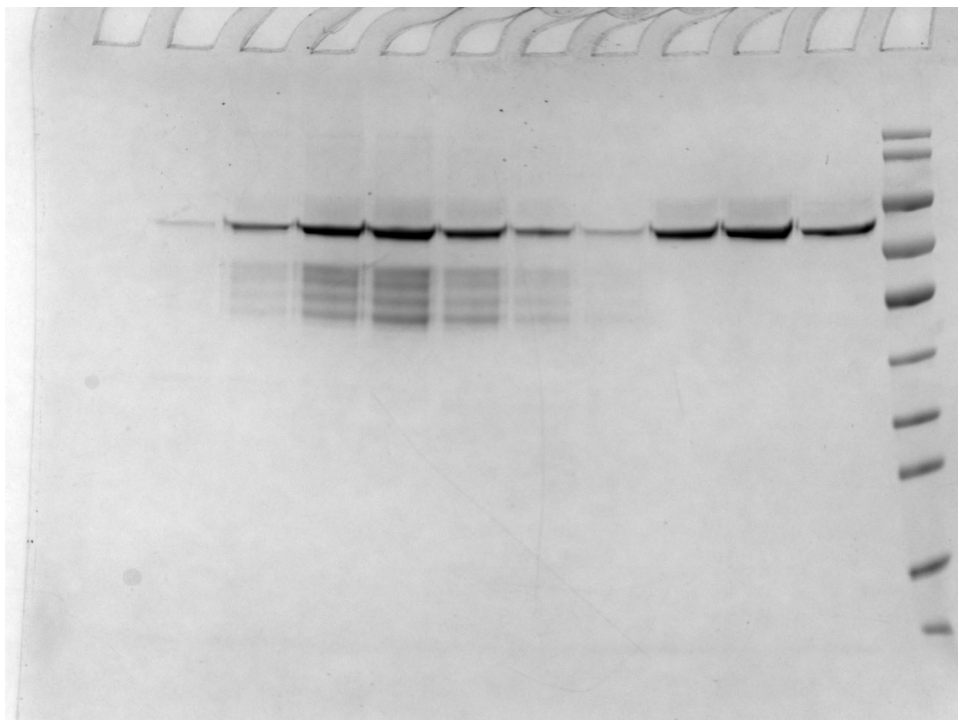

Uncropped SDS PAGE (Supplementary Figure 5h)

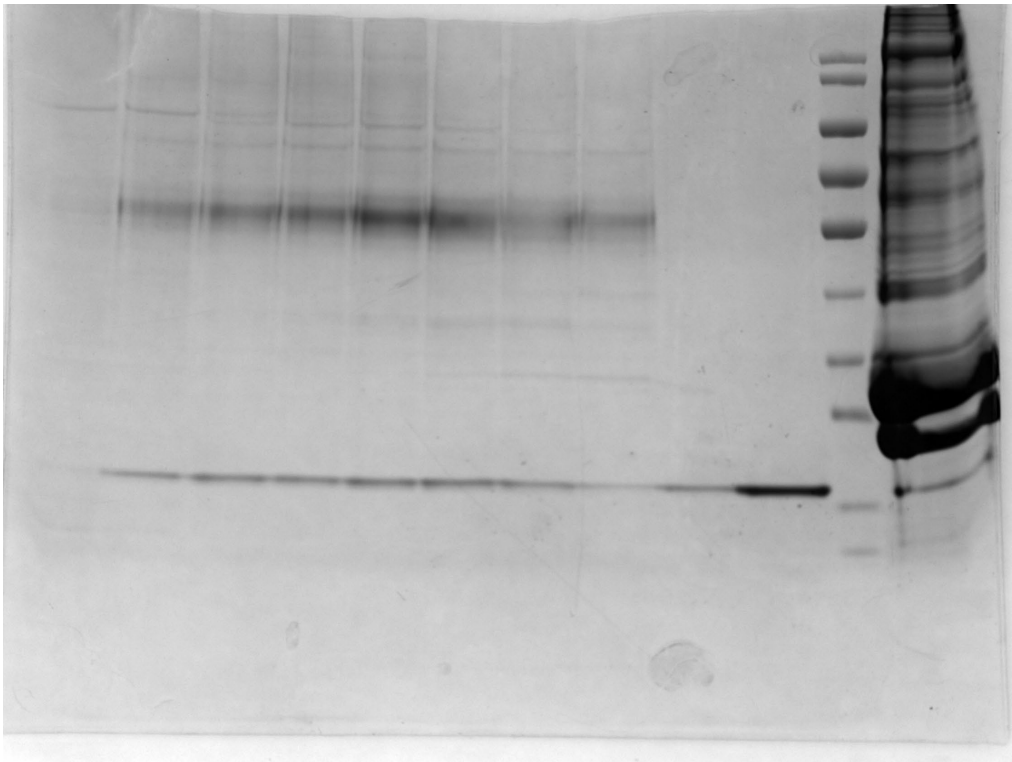

Uncropped SDS PAGE (Supplementary Figure 5i)

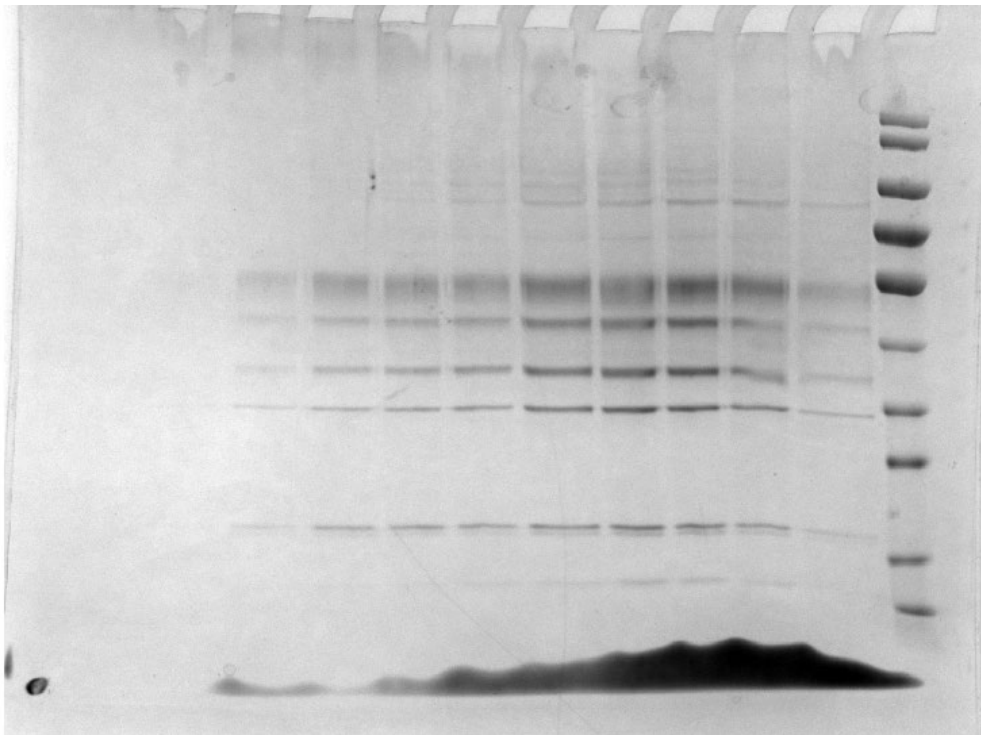

Supplement: 41467_2024_55555_MOESM1_ESM.pdf [file 41467_2024_55555_MOESM1_ESM.pdf]
