# Supplementary material for: Structural insights into the regulation of monomeric and dimeric apelin receptor
Source: PubMed Central journal article supplement (PMC11697037; doi:10.1038/s41467-024-55555-6), 2025-01-02
Supplement: 41467_2024_55555_MOESM2_ESM.pdf [file 41467_2024_55555_MOESM2_ESM.pdf]

## **Description of Additional Supplementary Files**

**File name: Supplementary Data 1**

Description: Gromacs \*.mdp input file for the production run.

**File name: Supplementary Data 2**

Description: Representative snapshot after 250ns production run for antagonist bound APJR.

**File name: Supplementary Data 3**

Description: Representative snapshot after 250ns production run for apo APJR.

**File name: Supplementary Data 4**

Description: Representative snapshot after 250ns production run for AP13 bound APJR.
